# Supplementary material for: Genetic Variation in Released Gametes Produces Genetic Diversity in the Offspring of the Broadcast Spawning Coral Acropora Tenuis
Source: Research Square preprint supplement (doi:10.21203/rs.3.rs-998221/v1), 2021-10-29
Supplement: Supplementary file 2 [file 495fb5b73444cbfeafcc3482.xlsx]

## Sheet: Sheet1
Table 1. Alleles detected in seawater and fertilized egg samples
12406m3
Float No.	1st collection	2nd	3rd	4th	5th	6th	Genptypes of spawned colony	Colony No.
1	156¶, 159*†, 162, 165, 168 (1 egg)	156, 159†, 162, 165* (2 eggs)	156, 159*†, 162, 165* (6 eggs)	156*, 159*†, 162*, 165* (31eggs)	156*, 159*†, 162*, 165* (24 eggs)	156*, 159*†, 162*, 165*, 171¶, 174 (25 eggs)	159, 171	ten15
2	156, 159*, 162*, 165* (9 eggs)	153, 159* (2 eegs)	156¶, 159*, 162¶, 165* (9 eggs)	153, 156¶, 159*, 162*, 165*, 168¶ (6 eggs)	153*, 156*, 159*, 162*, 165*, 168*, 174 (117 eggs)	Seawater was not collected	162	ten21
3	159*, 162¶, 165¶ (2 eggs)	N.D. (2 eggs)	156*, 159*, 162*, 165*, 168 (47 eggs)	156*, 159*, 162*, 165*, 168*, 171, 174 (96 eggs)	Seawater was not collected	Seawater was not collected	194	ten27
4	156, 159, 162, 165†, 168	N.D.	156, 159, 162, 165†	165†	156, 159, 162, 165†	156, 159, 162, 165†, 168, 171	153, 165	ten31
* Alles found in both fertilized eggs and sperm, ¶ Alleles found only in fertilzed eggs, †Alleles from tagged colony, alleles without mark was found only in sperm
11543m5
Float No.	1st collection	2nd	3rd	4th	5th	6th	Genptypes of spawned colony	Colony No.
1	126*	120, 122, 126*, 130	120, 122, 126*, 130, 132¶	120, 122, 126*, 130, 132¶	120, 122, 126*, 130, 132¶	120, 122, 126*, 130, 132¶	128	ten15
2	120, 122, 126*, 128†, 130, 132¶	120, 122, 126*, 130, 154	126*, 130, 132¶	126*, 130, 132¶	120, 122, 126*, 128†, 130, 132¶	Seawater was not collected	128.132	ten21
3	126*, 130, 132¶	126*, 130, 132¶	120, 122, 126*, 130, 132¶	120, 122, 126*, 128†, 130, 132¶	Seawater was not collected	Seawater was not collected	128132	ten27
4	120, 122, 124, 126, 128†, 130, 154	126, 130	126, 128†, 130	126, 130	126, 130	126, 130, 230	128, 132	ten31
* Alles found in both fertilized eggs and sperm, ¶ Alleles found only in fertilzed eggs, †Alleles from tagged colony, alleles without mark was found only in sperm
11401m4
Float No.	1st collection	2nd	3rd	4th	5th	6th	Genptypes of spawned colony	Colony No.
1	403*, 407¶, 411, 415	391*, 399, 410, 403*, 407, 411	399, 401, 403*, 407	399*, 403*, 407*, 411	391*, 395, 399*, 401¶, 403*, 407*, 411	391*, 399*, 403*, 407*, 411	N.D.	ten15
2	391, 395, 399†, 403*, 407*, 411	391*, 395, 399†, 401, 403*, 407, 411	395¶, 399*†, 403, 405¶, 407*	391, 399*†, 401¶ 403*, 407¶, 409, 411	391*, 395, 399*†, 401*, 403*, 405, 407*, 409, 411	Seawater was not collected	399	ten21
3	383, 399, 403*, 407*, 411,415	383, 391, 399*, 401¶, 403*, 407*	391*, 395¶, 399*, 403*, 407*, 409¶, 411	391*, 399*,401¶, 403*, 407*, 411	Seawater was not collected	Seawater was not collected	409, 413	ten27
4	383, 395, 399, 403, 407, 411	403	403	391, 403	399, 407	391, 395, 401, 403, 407, 409†, 411	409, 413	ten31
* Alles found in both fertilized eggs and sperm, ¶ Alleles found only in fertilzed eggs, †Alleles from tagged colony, alleles without mark was found only in sperm
441m6
Float No.	1st collection	2nd	3rd	4th	5th	6th	Genptypes of spawned colony	Colony No.
1	285*, 291*	285*, 291*, 297*,303	285*, 291*,297*, 303	285*, 291*,297*, 299¶†, 303¶	285*, 291*,297*, 299¶, 303	285*, 291*, 297*, 303*	299	ten15
2	285*, 291*, 297, 299*†	279, 285*, 291*, 297	285*, 291*, 297*, 303	285*, 291*†, 297*, 303	285*, 291*†, 297*, 299¶, 303*	Seawater was not collected	291	ten21
3	285*†, 291*	285*†, 291*, 297¶, 299¶	285*†, 291*, 297*, 299¶	279¶, 285*†, 291*, 297*, 299¶, 303	Seawater was not collected	Seawater was not collected	285	ten27
4	285, 292, 297†, 303	N.D.	285, 292, 297†	285, 291, 303	N.D.	285, 291, 297†	297	ten31
* Alles found in both fertilized eggs and sperm, ¶ Alleles found only in fertilzed eggs, †Alleles from tagged colony, alleles without mark was found only in sperm
11292m4
Float No.	1st collection	2nd	3rd	4th	5th	6th	Genptypes of spawned colony	Colony No.
1	471*, 483*, 487	471*, 475, 483, 487*, 495	471*, 475, 483, 487*	471*, 475, 483*, 487*, 495	471*, 475*, 479, 483*, 487*, 495	471*, 475, 483*, 487*	N.D.	ten15
2	471*†, 475*, 483*, 487¶, 491¶	471*†, 483¶	471*†, 475, 483*, 487	463¶, 471*†, 483*, 487, 491	463*, 471*†, 483*, 487*, 491*	Seawater was not collected	471	ten21	*
3	471*, 475¶, 483†	N.D.	471*, 475, 483*†, 487*	471*, 479, 483*†, 487*, 491*	Seawater was not collected	Seawater was not collected	483	ten27
4	471†, 483†, 487	N.D.	471†, 475, 483†, 487	N.D.	471†	471†, 483†	471, 483	ten31
* Alles found in both fertilized eggs and sperm, ¶ Alleles found only in fertilzed eggs, †Alleles from tagged colony, alleles without mark was found only in sperm
10366m5
Float No.	1st collection	2nd	3rd	4th	5th	6th	Genptypes of spawned colony	Colony No.
1	215* 217, 223†, 225, 227¶	215*, 217, 223†, 225	215*, 217¶, 223¶, 225*, 227¶	213*, 215*, 217*, 225*, 227*	213*, 215*, 217*, 225*, 227*	213*, 215*, 217*, 223¶, 225*, 227	223	ten15
2	213*, 215*, 217¶, 223¶, 225*, 227	N.D.	N.D.	211¶, 215*, 217¶, 223†, 225*	209¶, 213*, 215*, 217*, 219, 223*†, 225*, 227	Seawater was not collected	223	ten21	*
3	N.D.	N.D.	209*, 211, 213*, 215*, 217*†, 225*, 227*	213*, 215*†, 217*†, 219, 223*, 225*, 227*	Seawater was not collected	Seawater was not collected	217	ten27
4	N.D.	N.D.	N.D.	N.D.	N.D.	N.D.	223	ten31
* Alles found in both fertilized eggs and sperm, ¶ Alleles found only in fertilzed eggs, †Alleles from tagged colony, alleles without mark was found only in sperm
12130m5
Float No.	1st collection	2nd	3rd	4th	5th	6th	Genptypes of spawned colony	Colony No.
1	241*†, 277*	241*†, 277*	241*†, 269*, 277*	241*†, 261, 277*	241*†, 261†, 277*	241*, 269*, 277*	241, 261	ten15
2	241*†, 277*†	241*†, 277¶†	241*†, 269¶, 277*†	241*†, 269*, 277†	241*†, 261, 269*, 277*†	Seawater was not collected	241, 277	ten21	*
3	241*†, 277*	241*†, 277*	241*†, 277*	229, 241*†, 261, 269*, 277*	Seawater was not collected	Seawater was not collected	241	ten27
4	241†, 277	215, 241†	241†, 277	241†, 277	241†, 277	241†, 277	241	ten31
* Alles found in both fertilized eggs and sperm, ¶ Alleles found only in fertilzed eggs, †Alleles from tagged colony, alleles without mark was found only in sperm
